# Supplementary material for: Enhancement of pore confinement caused by the mosaic structure on Ru nanoparticles for pH-universal hydrogen evolution reaction
Source: Royal Society of Chemistry journal article supplement (doi:10.1039/d2ta09167d), 2023-01-01
Supplement: d2ta09167d1.pdf [file d2ta09167d1.pdf]

## Supplementary information

### **Enhancement of pore confinement caused by mosaic structure on Ru nanoparticles for pH-universal hydrogen evolution reaction**

Xiaofang Ma, He Xiao\*, Yang Gao, Man Zhao, Li Zhang, Junming Zhang, Jianfeng Jia\* and Haishun Wu

Key Laboratory of Magnetic Molecules & Magnetic Information Materials Ministry of Education,  
The School of Chemical and Material Science, Shanxi Normal University, Taiyuan 030000, China

\*Corresponding author

E-mail: xiaohex200808@sxnu.edu.cn (H. Xiao); jiajf@dns.sxnu.edu.cn (J.F. Jia)

#### **1 Some supplementary information during the experiment**

The turnover frequency (TOF) values of the catalysts for the HER were calculated through the following equation:

$$\text{TOF (s}^{-1}\text{)} = (j \times A) / (2 \times F \times n).$$

In the formula,  $j$  ( $\text{A} \cdot \text{cm}^{-2}$ ) is the current density at an overpotential of -100 mV,  $A = 0.07065 \text{ cm}^2$  is the geometric surface area of the glassy carbon electrode,  $F = 96,500 \text{ C} \cdot \text{mol}^{-1}$  is the Faraday constant, and  $n$  (mol) is the molar number of Ru loaded on the working electrode, which was calculated according to the result of ICP-OES.

The Faraday efficiency (FE) of the HER is determined using  $\text{FE} = n / (Q/2F)$ , where  $F$  is the Faraday constant,  $n$  is the total amount of  $\text{H}_2$ , and  $Q$  is the total amount of charge obtained from the  $i$ - $t$  curve.

#### **2 Characterization techniques and other Supplements**

Fig. S5 present the cyclic voltammetry (CV) curves of the Ru/HMCs- $x$  recorded in the potential range of 0.346-0.446 V, 1.024-1.124 V and 0.611-0.711 V in 0.5 M  $\text{H}_2\text{SO}_4$ , 1 M KOH, and 0.5 M PBS with different scanning rates (e.g., 20, 40, 60, 80, 100, 120, 140, 160, 180 and 200  $\text{mV} \cdot \text{s}^{-1}$ ), respectively. According to the slope of the current density, which linearly changes with the increase in the scanning speed, the  $C_{dl}$  values of the corresponding catalyst can be calculated.<sup>1</sup> After extracting the  $C_{dl}$

from the fitted linear regressions, we can calculate the electrochemically active surface area (ECSA) from the equation of  $ECSA = C_{dl}/C_s$ , where  $C_s$  are assumed to be same for all electrodes.<sup>2</sup>

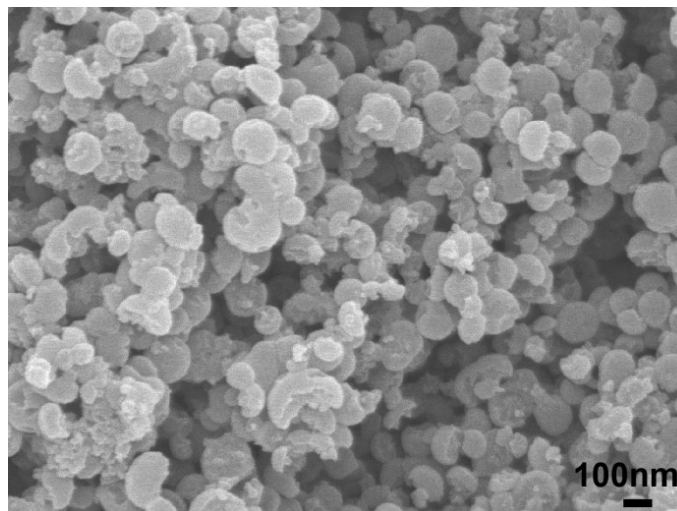

**Fig. S1** SEM images of hollow mesoporous carbon spheres was prepared by adjusting PH= 11.5 with sodium hydroxide.

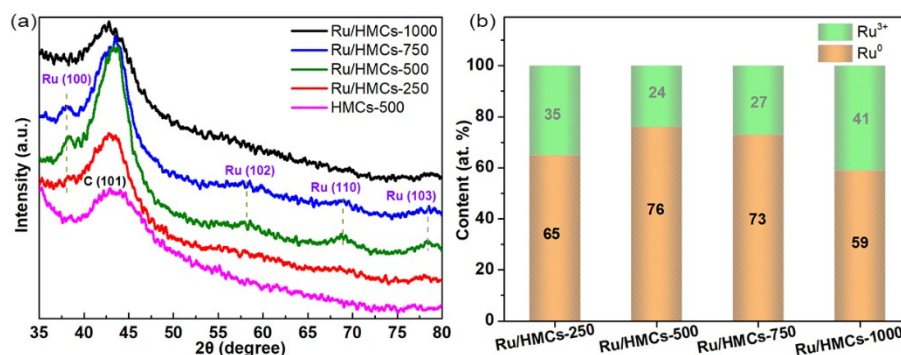

**Fig. S2** (a) Local enlarged XRD images of Ru/HMCs-x and HMCs-500. (b) Relative contents comparison of Ru<sup>0</sup> and Ru<sup>3+</sup> in as-prepared catalysts.

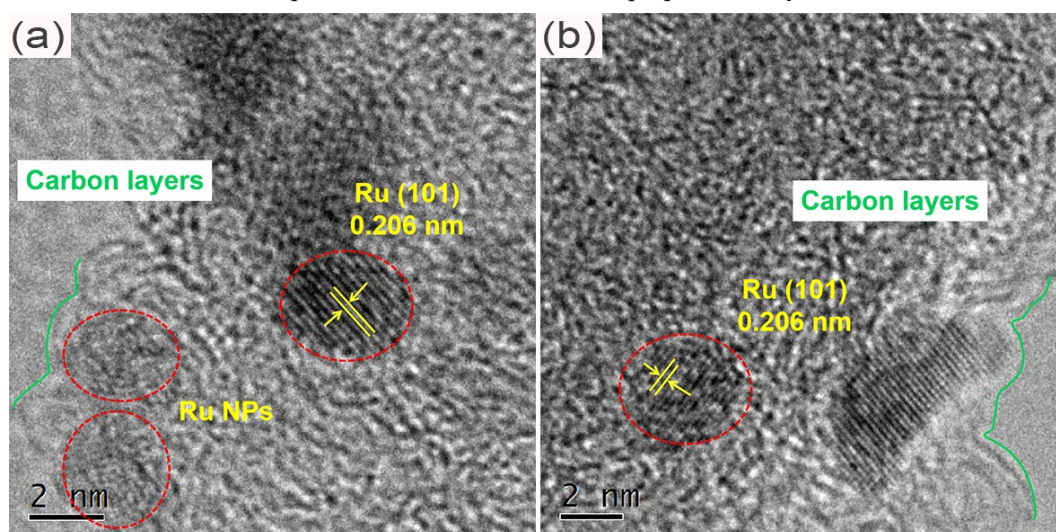

**Fig. S3** HRTEM images of Ru/HMCs-500.

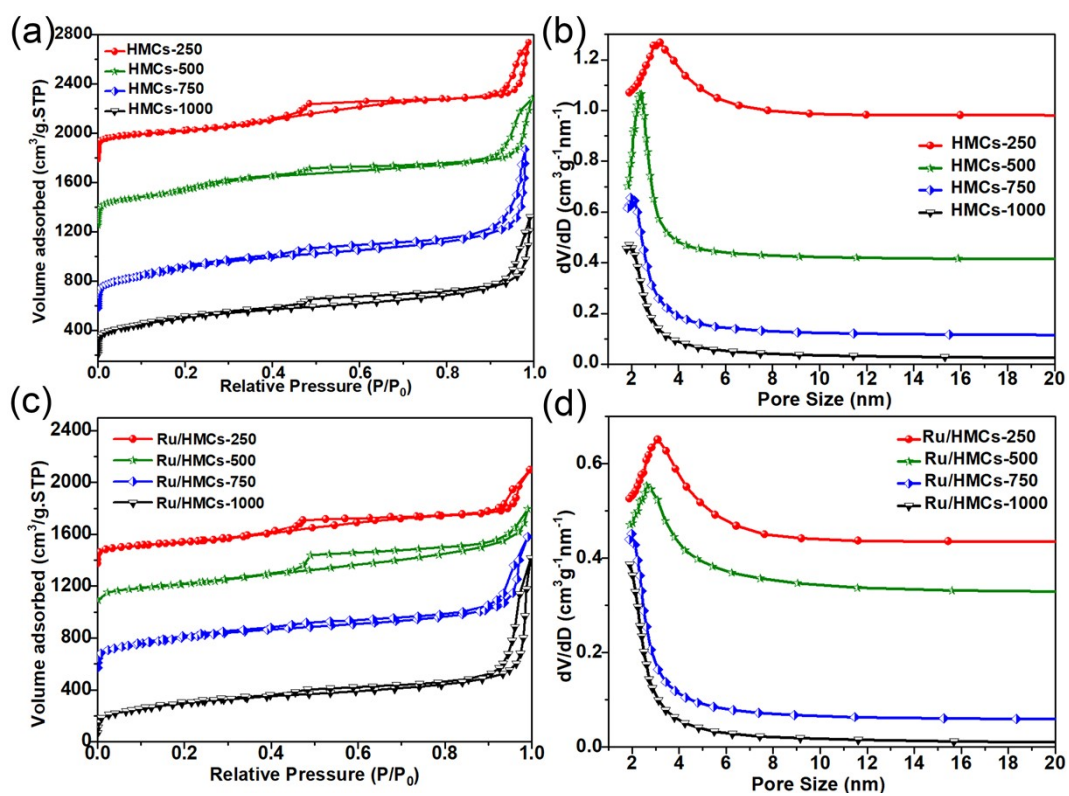

**Fig. S4** N<sub>2</sub> adsorption and desorption isotherms of (a) HMCs-x and (c) Ru/HMCs-x. Pore size distribution of (b) HMCs-x and (d) Ru/HMCs-x.

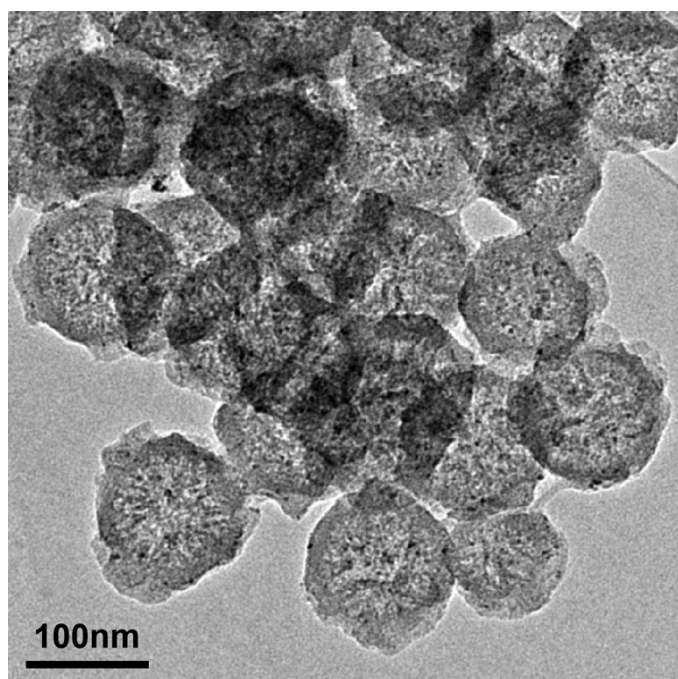

**Fig. S5** TEM images of Ru/HMCs-500.

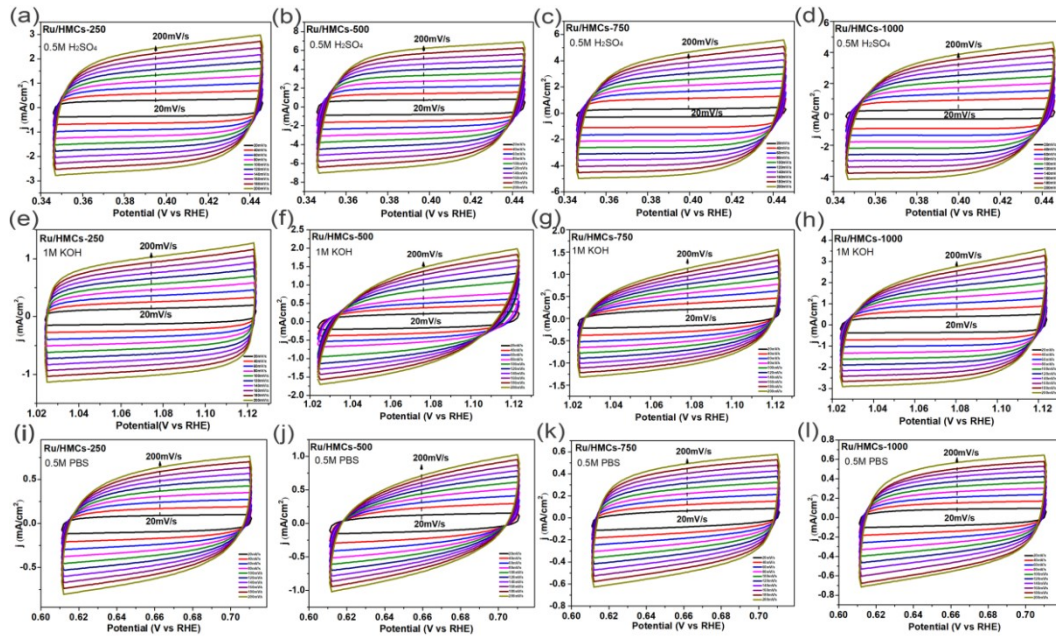

**Fig. S6** Cyclic voltammetry curves of Ru/HMCs-x at scan rates from 20 to 200  $\text{mV s}^{-1}$  in 0.5 M  $\text{H}_2\text{SO}_4$ , 1 M KOH, 0.5 M PBS, respectively. The differences in current density variation ( $\Delta J = J_a - J_c$ ) at overpotential of 0.396 V, 1.074 V, and 0.661 V in acidic, alkaline, and neutral solutions plotted against the scan rate fitted to a linear regression enables the estimation of  $C_{dl}$ .

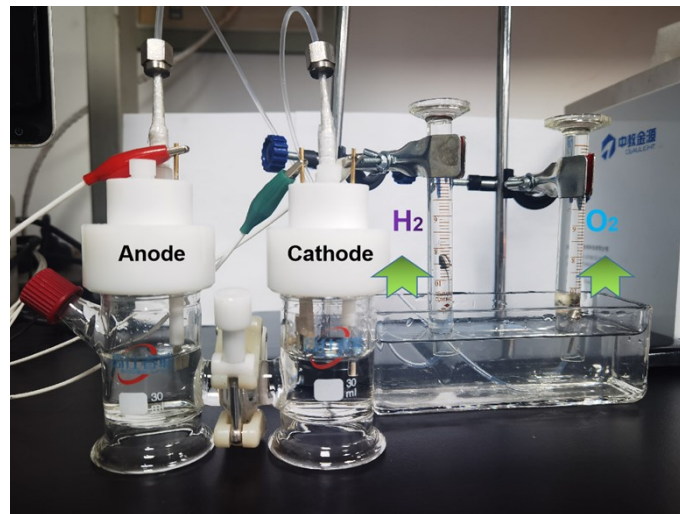

**Fig. S7** Diagram of the device for collecting hydrogen and oxygen using the drainage gas collection method.

The two compartments of the airtight H-type electrolytic cell were separated by Nafion membrane, one of which was a catalyst-decorated carbon paper working electrode (geometric area  $1 \text{ cm}^2$ , catalyst loading  $0.34 \text{ mg}\cdot\text{cm}^{-2}$ ) and Ag/AgCl reference electrode, the other chamber is the Pt sheet counter electrode. Under acidic and neutral conditions, the overpotential of 300 mV were tested for 10 min, and the released  $\text{H}_2$  was collected by the drainage gas-gathering method (Fig. S6). Under

alkaline conditions, due to the rapid hydrogen production, the overpotential was selected at 100 mV, and the amount of H<sub>2</sub> in the reaction for 10 min was collected.

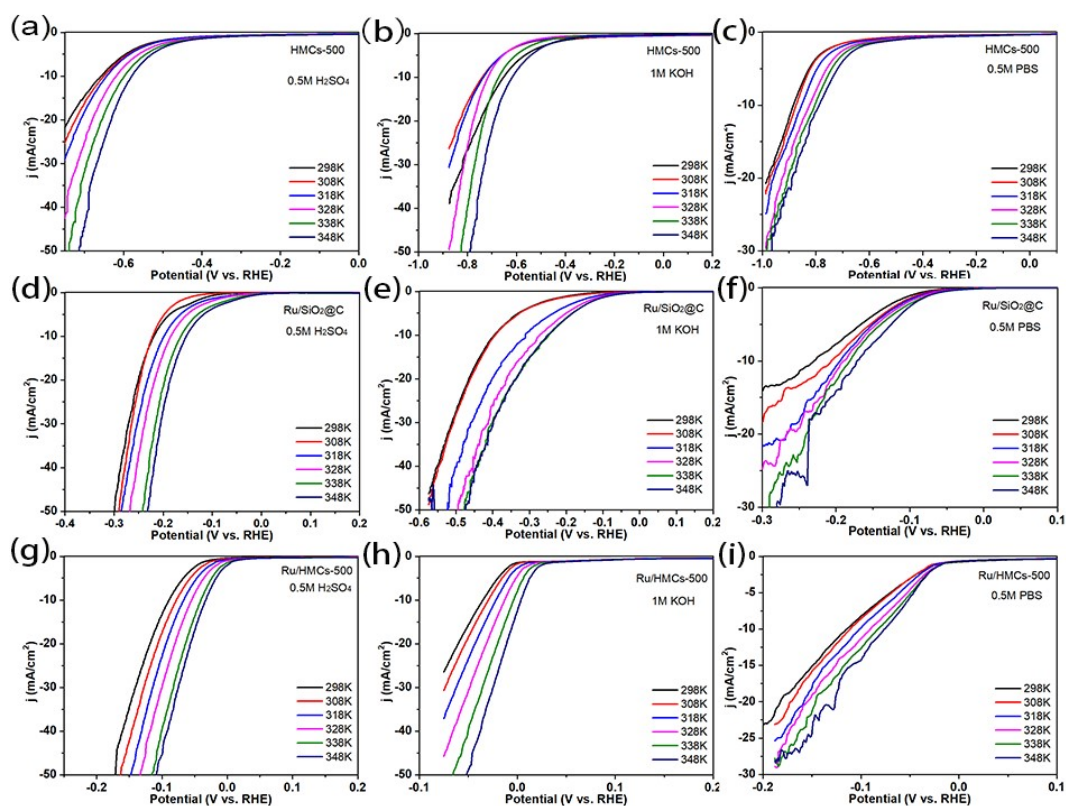

**Fig.S8** Linear sweep voltammetry (LSV) curves of the catalysts in different electrolytes at temperatures from 25 to 75 °C for the hydrogen evolution reaction (HER). (a-c) HMCs-500, (d-f) Ru/SiO<sub>2</sub>@C and (g-i) Ru/HMCs-500.

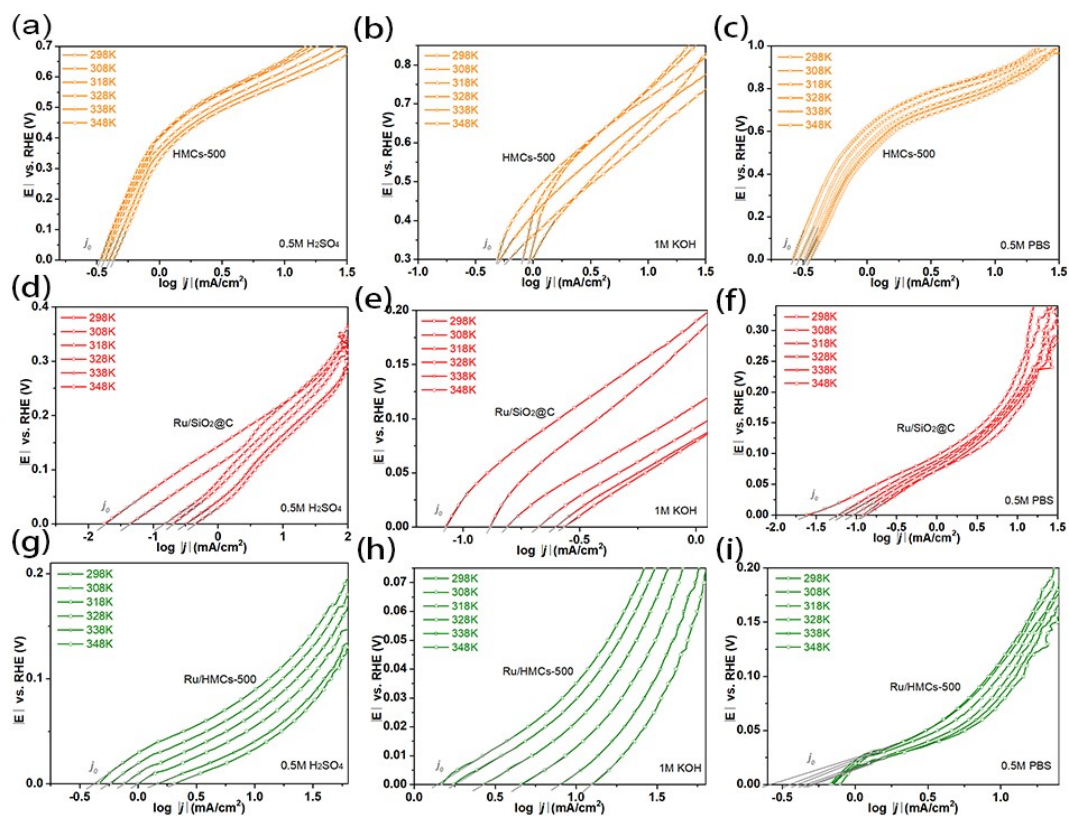

**Fig. S9** Tafel curves of (a-c) HMCs-500, (d-f) Ru/SiO<sub>2</sub>@C and (g-i) Ru/HMCs-500 catalysts in different electrolytes at different temperatures ranging from 298 to 348 K. The exchange current density ( $j_0$ ) was calculated by extending the linear part of Tafel plots.

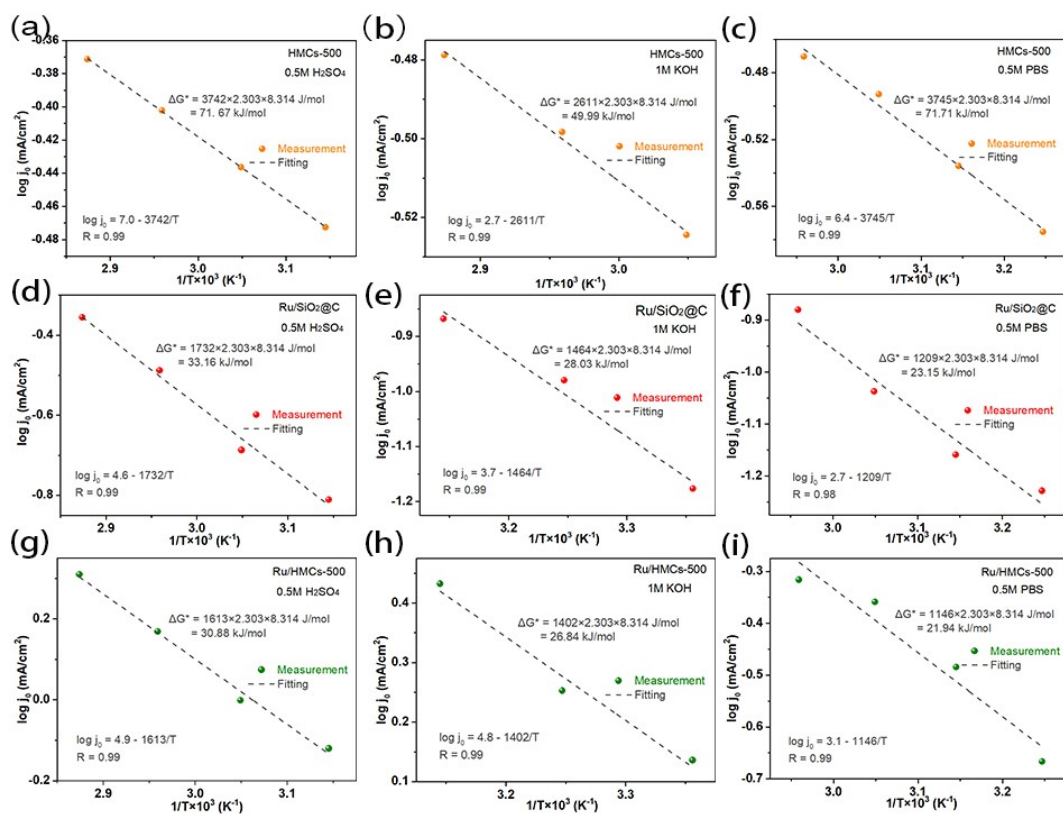

**Fig. S10** Typical Arrhenius plots for the (a-c) HMCs-500, (d-f) Ru/SiO<sub>2</sub>@C and (g-i) Ru/HMCs-500 catalysts in different electrolyte solutions. The calculation of the  $\Delta G^*$  is based on the Arrhenius equation:  $\log j_0 = \log(FKc) - \Delta G^*/2.303RT$ .

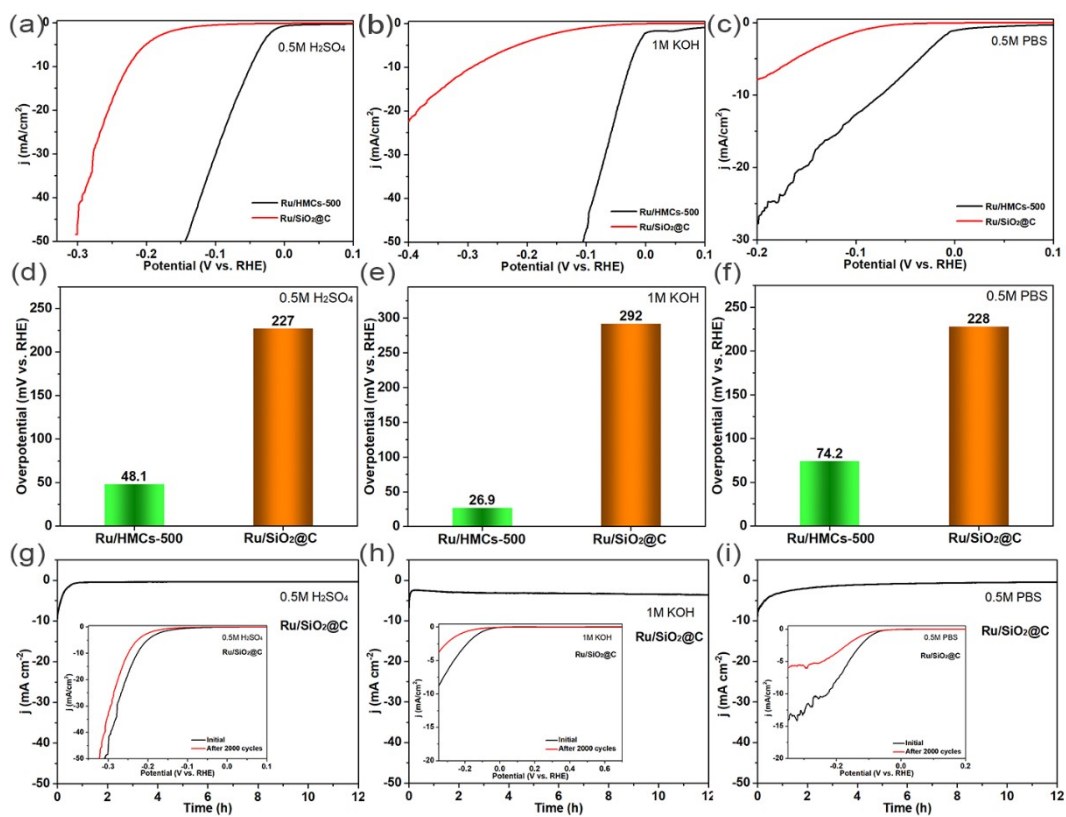

**Fig. S11** (a-c) Comparison of HER performance of Ru/SiO<sub>2</sub>@C and Ru/HMCs-500. (d-f) Histograms comparing overpotentials of Ru/HMCs-500 and Ru/SiO<sub>2</sub>@C at 10 mA·cm<sup>-2</sup> in different electrolytes. (g-i) The time-dependent current density curve of Ru/SiO<sub>2</sub>@C. (inset: LSV curves of the Ru/SiO<sub>2</sub>@C before and after 2000 CV cycles.)



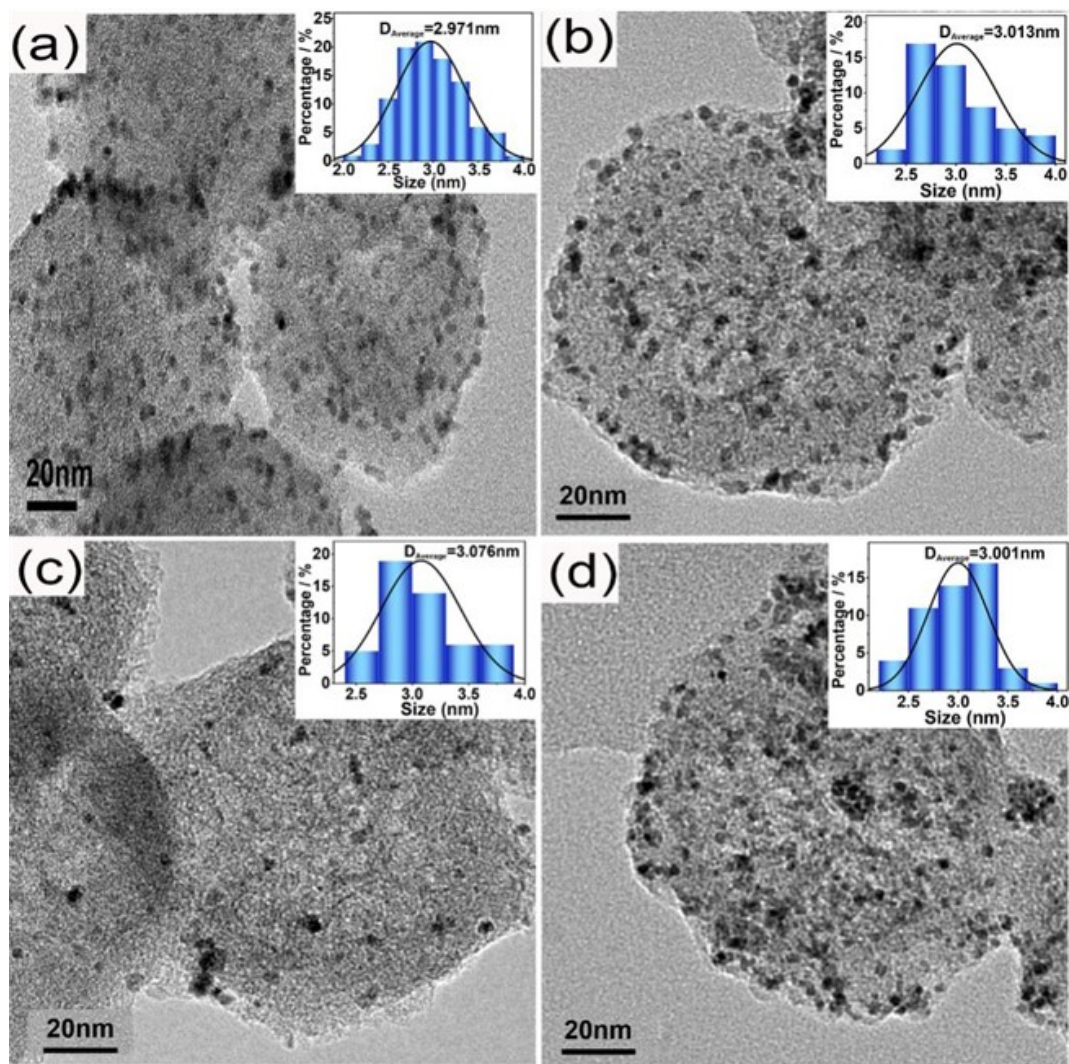

**Fig. S12** TEM comparison of Ru/HMCs-500 before and after LSV test. (a) TEM image of Ru/HMCs-500 before testing. (b) TEM image after testing in 0.5 M H<sub>2</sub>SO<sub>4</sub> solution, (c) in 1 M KOH solution and (d) in 0.5 M PBS solution. (Inset: Ru NPs size distribution images)

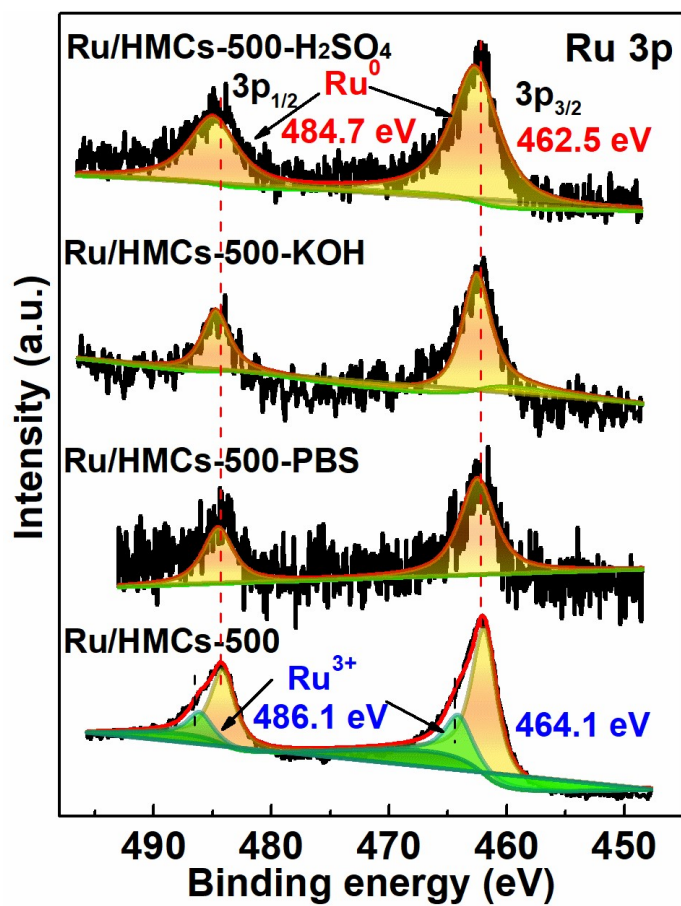

Fig. S13 Comparison of Ru 3p XPS peaks of Ru/HMCs-500 before and after LSV testing.

**Table S1** EDS and ICP-OES data of Ru/HMCs-x samples.

| Sample  |         | Ru/HMCs-250 | Ru/HMCs-500 | Ru/HMCs-750 | Ru/HMCs-1000 |
|---------|---------|-------------|-------------|-------------|--------------|
| EDS     | Ru wt.% | 3.67        | 1.82        | 1.99        | 4.22         |
| ICP-OES | Ru wt.% | 4.26        | 3.75        | 4.34        | 4.65         |

**Table S2** Textural Parameters of the Samples of HMCs-x and Ru/HMCs-x.

| Sample       | Average particle size (nm) | BET surface area (m <sup>2</sup> g <sup>-1</sup> ) | Pore volume (cm <sup>3</sup> g <sup>-1</sup> ) | Pore size (nm) |
|--------------|----------------------------|----------------------------------------------------|------------------------------------------------|----------------|
| HMCs-250     | 121.3                      | 861.4                                              | 1.51                                           | 3.21           |
| HMCs-500     | 121.1                      | 1177.1                                             | 1.71                                           | 2.42           |
| HMCs-750     | 97.63                      | 1260.6                                             | 2.04                                           | 1.96           |
| HMCs-1000    | 98.31                      | 1121.6                                             | 1.75                                           | 1.90           |
| Ru/HMCs-250  | 131.2                      | 680.9                                              | 1.19                                           | 3.09           |
| Ru/HMCs-500  | 128.7                      | 784.3                                              | 1.27                                           | 2.62           |
| Ru/HMCs-750  | 110.2                      | 984.7                                              | 1.61                                           | 1.97           |
| Ru/HMCs-1000 | 100.3                      | 947.5                                              | 2.08                                           | 1.90           |

**Table S3** Comparison of HER performance in 1 M KOH for Ru/HMCs-500 with other HER electrocatalysts.

| Reaction medium | Catalyst                           | $\eta_{10}/\text{mV}$ | Tafel slope (mV dec <sup>-1</sup> ) | Ref.      |
|-----------------|------------------------------------|-----------------------|-------------------------------------|-----------|
| 1 M KOH         | Ru/HMCs-500                        | 26.9                  | 45.7                                | This work |
|                 | MoP-Ru <sub>2</sub> P/NPC          | 47                    | 36.9                                | [3]       |
|                 | Ru-FeP                             | 62                    | 45                                  | [4]       |
|                 | Ru@Co/N-CNTs                       | 48                    | 45                                  | [5]       |
|                 | Co-Ru-MoS <sub>2</sub>             | 52                    | 55                                  | [6]       |
|                 | Ni <sub>5</sub> P <sub>4</sub> -Ru | 54                    | 52                                  | [7]       |

**Table S4** Comparison of HER performance in 0.5 M H<sub>2</sub>SO<sub>4</sub> for Ru/HMCs-500 with other HER electrocatalysts.

| Reaction medium                      | Catalyst                                  | $\eta_{10}/\text{mV}$ | Tafel slope (mV dec <sup>-1</sup> ) | Ref.             |
|--------------------------------------|-------------------------------------------|-----------------------|-------------------------------------|------------------|
| 0.5 M H <sub>2</sub> SO <sub>4</sub> | <b>Ru/HMCs-500</b>                        | <b>48.09</b>          | <b>38.99</b>                        | <b>This work</b> |
|                                      | Ru <sub>x</sub> Fe <sub>y</sub> -NCs /CNF | 66                    | 43.44                               | [1]              |
|                                      | MoP-Ru <sub>2</sub> P/NPC                 | 82                    | 64.99                               | [3]              |
|                                      | Ru@Co/N-CNTs                              | 92                    | 73                                  | [5]              |
|                                      | ECM@Ru                                    | 63                    | 47                                  | [8]              |
|                                      | Ni@Ni <sub>2</sub> P-Ru HNRs              | 51                    | 35                                  | [9]              |
|                                      | Ru@WNO-C                                  | 172                   | —                                   | [10]             |
|                                      | RuTe <sub>2</sub> /Gr                     | 72                    | 33                                  | [11]             |

**Table S5** Comparison of HER performance in 1 M PBS for Ru/HMCs-500 with other HER electrocatalysts.

| Reaction medium | Catalyst                  | $\eta_{10}/\text{mV}$ | Tafel slope (mV dec <sup>-1</sup> ) | Ref.             |
|-----------------|---------------------------|-----------------------|-------------------------------------|------------------|
|                 | <b>Ru/HMCs-500</b>        | <b>71.1</b>           | <b>53.0</b>                         | <b>This work</b> |
|                 | MoP-Ru <sub>2</sub> P/NPC | 126                   | 70.89                               | [3]              |
|                 | RuP-475                   | 47                    | 45                                  | [12]             |
| 1 M PBS         | s-RuS <sub>2</sub> /S-rGO | 93                    | 41                                  | [13]             |
|                 | RuP <sub>2</sub> @NPC     | 57                    | 87                                  | [14]             |
|                 | Ru/C-2                    | 188                   | 109                                 | [15]             |
|                 | RuP@NPC                   | 110                   | 59                                  | [16]             |

## References

1. B. Yang, J. Xu, D. Bin, J. Wang, J. Zhao, Y. Liu, B. Li, X. Fang, Y. Liu, L. Qiao, L. Liu and B. Liu, *Appl. Catal. B*, 2021, **238**, 119583.
2. J. Q. Chi, X. J. Zeng, X. Shang, B. Dong, Y. M. Chai, C. G. Liu, M. Marin and Y. Yin, *Adv. Funct. Mater.*, 2019, **29**, 1901790.
3. Y. Gao, Z. Chen, Y. Zhao, W. Yu, X. Jiang, M. He, Z. Li, T. Ma, Z. Wu and L. Wang, *Appl. Catal. B*, 2022, **303**, 120879.
4. H. Shang, Z. Zhao, J. Pei, Z. Jiang, D. Zhou, A. Li, J. Dong, P. An, L. Zheng and W. Chen, *J. Mater. Chem. A*, 2020, **8**, 22607-22612.
5. Z. Liu, X. Yang, G. Hu and L. Feng, *ACS Sustain. Chem. Eng.*, 2020, **8**, 9136-9144.
6. S. Kwon, T. T. Debela, I. H. Kwak, Y. C. Park, J. Seo, J. Y. Shim, S. J. Yoo, J. G. Kim, J. Park and H. S. Kang, *Small*, 2020, **16**, 2000081.
7. Q. He, D. Tian, H. Jiang, D. Cao, S. Wei, D. Liu, P. Song, Y. Lin and L. Song, *Adv. Mater.*, 2020, **32**, 1906972.
8. H. Zhang, W. Zhou, X. F. Lu, T. Chen and X. W. Lou, *Adv. Energy Mater.*, 2020, **10**, 2000882.
9. Y. Liu, Y. Liu, S. Liu, Y. Wang, Q. Zhang, L. Gu, S. Zhao, D. Xu, Y. Li, J. Bao and Z. Dai, *J. Am. Chem. Soc.*, 2018, **140**, 2731-2734.
10. G. Meng, H. Tian, L. Peng, Z. Ma, Y. Chen, C. Chen, Z. Chang, X. Cui and J. Shi, *Nano Energy*, 2021, **80**, 105531.
11. X. Gu, X. Yang and L. Feng, *Chem. Asian. J.*, 2020, **15**, 2886-2891.
12. Q. Chang, J. Ma, Y. Zhu, Z. Li, D. Xu, X. Duan, W. Peng, Y. Li, G. Zhang, F. Zhang and X. Fan, *ACS Sustain. Chem. Eng.*, 2018, **6**, 6388-6394.
13. J. Yu, Y. Guo, S. Miao, M. Ni, W. Zhou and Z. Shao, *ACS Appl. Mater. Interfaces*, 2018, **10**, 34098-34107.
14. Z. Pu, I. S. Amiinu, Z. Kou, W. Li and S. Mu, *Angew. Chem. Int. Ed. Engl.*, 2017, **56**, 11559-11564.
15. H. Shi, L. Liu, Y. Shi, F. Liao, Y. Li and M. Shao, *Int. J. Hydrog. Energy*, 2019, **44**, 11817-11823.
16. J. Q. Chi, W. K. Gao, J. H. Lin, B. Dong, K. L. Yan, J. F. Qin, B. Liu, Y. M. Chai and C. G.

Liu, *ChemSusChem*, 2018, **11**, 743-752.
